# Supplementary material for: NHR-8 and P-glycoproteins uncouple xenobiotic resistance from longevity in chemosensory C. elegans mutants
Source: eLife. 2021 Aug 27;10:e53174. doi: 10.7554/eLife.53174 (PMC8460253; doi:10.7554/eLife.53174)
Supplement: Figure 1—figure supplement 1—source data 1. — (Figure 1—figure supplement 1). [file elife-53174-fig1-figsupp1-data1.xlsx]

## Sheet: Sheet1
Fig.1 Sup Fig. 1A	Developmental TM resistance assay with WT and che-2(e1033)X animals.
	TM (µg/ml)	WT			che-2(e1033)X
	0	80	100	100	94	100	71
	2	90	86	82	88	75	84
	4	40	80	44	80	73	71
	6	46	37	20	76	81	76
	8	8	4	0	61	78	65
	10	0	0	0	48	48	44
