# Supplementary material for: NHR-8 and P-glycoproteins uncouple xenobiotic resistance from longevity in chemosensory C. elegans mutants
Source: eLife. 2021 Aug 27;10:e53174. doi: 10.7554/eLife.53174 (PMC8460253; doi:10.7554/eLife.53174)
Supplement: Figure 1—figure supplement 1—source data 2. — (Figure 1—figure supplement 1). [file elife-53174-fig1-figsupp1-data2.xlsx]

## Sheet: Sheet1
Fig.1 Sup Fig. 1B	Developmental TM resistance assay with WT and che-11(e1810)V animals.
	TM (µg/ml)	WT		che-11(e1810)V
	0	100	100	100	82
	2	63	100	100	100
	4	21	31	100	93
	6	9	0	90	67
	8	0	0	75	31
	10	0	0	64	60
