# Supplementary material for: NHR-8 and P-glycoproteins uncouple xenobiotic resistance from longevity in chemosensory C. elegans mutants
Source: eLife. 2021 Aug 27;10:e53174. doi: 10.7554/eLife.53174 (PMC8460253; doi:10.7554/eLife.53174)
Supplement: Figure 1—figure supplement 1—source data 4. — (Figure 1—figure supplement 1). [file elife-53174-fig1-figsupp1-data4.xlsx]

## Sheet: Sheet1
Fig.1 Sup Fig. 1D	Developmental TM resistance assay with WT and dyf-1(mn335)I animals.
	TM (µg/ml)	WT			dyf-1(mn335)I
	0	80	100	100	100	100	96
	2	90	86	82	100	100	92
	4	40	80	44	100	97	100
	6	46	37	20	100	88	100
	8	8	4	0	82	86	100
	10	0	0	0	84	72	60
