# Supplementary material for: NHR-8 and P-glycoproteins uncouple xenobiotic resistance from longevity in chemosensory C. elegans mutants
Source: eLife. 2021 Aug 27;10:e53174. doi: 10.7554/eLife.53174 (PMC8460253; doi:10.7554/eLife.53174)
Supplement: Figure 1—figure supplement 1—source data 5. — (Figure 1—figure supplement 1). [file elife-53174-fig1-figsupp1-data5.xlsx]

## Sheet: Sheet1
Fig.1 Sup Fig. 1E	Developmental TM resistance assay with WT and osm-1(p808)X animals.
	TM (µg/ml)	WT		osm-1(p808)X
	0	100	100	92	100
	2	63	100	100	50
	4	21	31	100	70
	6	9	0	70	70
	8	0	0	71	75
	10	0	0	88	83
