# Supplementary material for: NHR-8 and P-glycoproteins uncouple xenobiotic resistance from longevity in chemosensory C. elegans mutants
Source: eLife. 2021 Aug 27;10:e53174. doi: 10.7554/eLife.53174 (PMC8460253; doi:10.7554/eLife.53174)
Supplement: Figure 1—figure supplement 1—source data 6. — (Figure 1—figure supplement 1F). [file elife-53174-fig1-figsupp1-data6.xlsx]

## Sheet: Sheet1
Fig.1 Sup Fig. 1F	Developmental TM resistance assay with WT and osm-5(p813)X animals.
	TM (µg/ml)	WT			osm-5(p813)X
	0	80	100	100	100	89	94
	2	90	86	82	100	89	100
	4	40	80	44	92	83	100
	6	46	37	20	87	96	97
	8	8	4	0	100	86	100
	10	0	0	0	65	93	91
