# Supplementary material for: NHR-8 and P-glycoproteins uncouple xenobiotic resistance from longevity in chemosensory C. elegans mutants
Source: eLife. 2021 Aug 27;10:e53174. doi: 10.7554/eLife.53174 (PMC8460253; doi:10.7554/eLife.53174)
Supplement: Figure 1—figure supplement 1—source data 9. — (Figure 1—figure supplement 1). [file elife-53174-fig1-figsupp1-data9.xlsx]

## Sheet: Sheet1
Fig.1 Sup Fig. 1I	Developmental TM resistance assay with WT and odr-3(n2150)V animals.
	TM (µg/ml)	WT		odr-3(n2150)X
	0	100	100	90	94
	2	89	100	100	92
	4	35	30	70	60
	6	10	9	12	25
	8	0	0	0	0
	10	0	0	0	0
