# Supplementary material for: NHR-8 and P-glycoproteins uncouple xenobiotic resistance from longevity in chemosensory C. elegans mutants
Source: eLife. 2021 Aug 27;10:e53174. doi: 10.7554/eLife.53174 (PMC8460253; doi:10.7554/eLife.53174)
Supplement: Figure 1—source data 1. [file elife-53174-fig1-data1.xlsx]

## Sheet: Sheet1
Fig. 1C	Developmental tunicamycin (TM) resistance assay using the indicated concentrations with WT and osm-3(dh441)IV animals.
	TM	WT			osm-3(dh441) IV
	0	100	100	100	61	100	87
	2	43	71	47	100	100	96
	4	25	27	39	100	93	77
	6	0	0	0	69	87	88
	8	0	0	0	82	94	95
	10	0	0	0	93	79	84
