# Supplementary material for: NHR-8 and P-glycoproteins uncouple xenobiotic resistance from longevity in chemosensory C. elegans mutants
Source: eLife. 2021 Aug 27;10:e53174. doi: 10.7554/eLife.53174 (PMC8460253; doi:10.7554/eLife.53174)
Supplement: Figure 2—figure supplement 1—source data 1. [file elife-53174-fig2-figsupp1-data1.xlsx]

## Sheet: Sheet1
Fig.2 Sup Fig. 2A	Quantitative PCR measuring relative mRNA expression of indicated genes in WT animals and osm-3(dh441)IV mutants after 6 hours of vehicle or TM treatment
		WT		WT TM		osm-3(dh441)IV		osm-3(dh441)IV TM
	hsp-4	1	1	1.974	2.669	0.715	1.051	0.729	1.226
	cnx-1	1	1		1.218	0.544	2.462	0.604	0.728
	crt-1	1	1	1.954	2.949	0.842	2.194	1.048	1.024
	pdi-1	1	1	1.396	2.178	0.647	1.504	0.72	1.031
	ero-1	1	1	1.415	1.863	0.847	1.4	0.874	1.028
	dnj-27	1	1	4.509	3.914	0.746	1.256	0.752	1.099
	T14G8.3	1	1	2.736	2.942	0.865	1.797	1.123	0.841
	T24H7.2	1	1	1.498	1.98	1.041	1.525	1.074	1.206
