# Supplementary material for: NHR-8 and P-glycoproteins uncouple xenobiotic resistance from longevity in chemosensory C. elegans mutants
Source: eLife. 2021 Aug 27;10:e53174. doi: 10.7554/eLife.53174 (PMC8460253; doi:10.7554/eLife.53174)
Supplement: Figure 2—source data 1. [file elife-53174-fig2-data1.xlsx]

## Sheet: Sheet1
Fig. 2C	Biosorter analysis of osm-3(dh441)IV vs. WT animals in the hsp-4::GFP background after 6 hours of control or TM treatment
		Wild type					osm-3(dh441)IV
	Vehicle	1	1	1	1	1	0.573063	0.65438	0.794731	0.558998	0.524918
	Tunicamycin (10 µg/ml)	2.37791	4.40807	3.32709	3.87929	2.99957	0.75467	1.24498	0.952055	0.627873	0.649929
		2way ANOVA; multiple comparaison
		n=5
		p value<0,0001 WT vehicle vs WT TM
