# Supplementary material for: NHR-8 and P-glycoproteins uncouple xenobiotic resistance from longevity in chemosensory C. elegans mutants
Source: eLife. 2021 Aug 27;10:e53174. doi: 10.7554/eLife.53174 (PMC8460253; doi:10.7554/eLife.53174)
Supplement: Figure 2—source data 2. — (Figure 2E). [file elife-53174-fig2-data2.xlsx]

## Sheet: Sheet1
Fig. 2E	Biosorter analysis of osm-3(dh441)IV vs. WT animals in the hsp-4::GFP background raised on control or sel-1 RNAi.
		Wild type			osm-3(dh441)IV
	Control	1	1	1	0.660228	0.539938	0.54071
	sel-1	4.4745	3.39341	3.94116	2.79029	2.50683	1.43293
		2way ANOVA; multiple comparaison
		n=3
		p value<0,0001 Control;WT vs sel-1;WT
		p value=0,0039 Control;osm-3(dh441) vs sel-1;osm-3(dh441)
