# Supplementary material for: NHR-8 and P-glycoproteins uncouple xenobiotic resistance from longevity in chemosensory C. elegans mutants
Source: eLife. 2021 Aug 27;10:e53174. doi: 10.7554/eLife.53174 (PMC8460253; doi:10.7554/eLife.53174)
Supplement: Figure 2—source data 3. [file elife-53174-fig2-data3.xlsx]

## Sheet: Sheet1
Fig. 2F	Quantitative PCR measuring relative hsp-4 and spliced and unspliced xbp-1 mRNA levels in WT and osm-3(dh441)IV animals after 2 hours of 10 mM DTT treatment
		WT hsp-4			osm-3(dh441)IV hsp-4			WT xbp-1 unspliced			osm-3(dh441)IV xbp-1 unspliced			WT xbp-1 spliced			osm-3(dh441)IV xbp-1 spliced
	Vehicle	1	1	1	0.827	0.429	0.307	1	1	1	1.665	0.578	0.569	1	1	1	1.149	0.221	0.096
	10 mM DTT	10.796	6.735	2.906	3.86	4.663	5.561	0.309	0.202	0.172	4.269	0.298	0.444	11.421	6.937	9.884	11.612	6.306	13.562
		2way ANOVA; multiple comparaison
		n=3
		p value=0,0018 WT;hsp-4 vehicle vs WT;hsp-4 DTT
		p value=0,0429 osm-3(dh441);hsp-4 vehicle vs osm-3(dh441);hsp-4 DTT
		p value<0,0001 WT;xbp-1 vehicle vs WT;xbp-1 DTT
		p value<0,0001 osm-3(dh441);xbp-1 vehicle vs osm-3(dh441);xbp-1 DTT
