# Supplementary material for: NHR-8 and P-glycoproteins uncouple xenobiotic resistance from longevity in chemosensory C. elegans mutants
Source: eLife. 2021 Aug 27;10:e53174. doi: 10.7554/eLife.53174 (PMC8460253; doi:10.7554/eLife.53174)
Supplement: Figure 3—figure supplement 1—source data 1. — (Figure 3—figure supplement 1). [file elife-53174-fig3-figsupp1-data1.xlsx]

## Sheet: Sheet1
Fig. 3 Sup Fig. 3A	Biosorter analysis of osm-3(dh441)IV vs. WT animals in the hsp-4::GFP background raised on control or daf-16 RNAi
		WT Luci			osm-3(dh441) Luci			WT- daf-16i			osm-3(dh441)- daf-16i
	Control	1	1	1	0.794731	0.558998	0.524918	0.863692	0.883868	0.7646	0.7489	0.590215	0.478156
	TM	3.32709	3.87929	2.99957	0.952055	0.627873	0.649929	3.01122	3.53743	3.04679	0.729394	0.596494	0.668255
		2way ANOVA; multiple comparaison
		n=3
		p value<0,0001 WT;Control vehicle vs WT;Control TM
		p value<0,0001 WT;daf-16i vehicle vs WT;daf-16i TM
