# Supplementary material for: NHR-8 and P-glycoproteins uncouple xenobiotic resistance from longevity in chemosensory C. elegans mutants
Source: eLife. 2021 Aug 27;10:e53174. doi: 10.7554/eLife.53174 (PMC8460253; doi:10.7554/eLife.53174)
Supplement: Figure 3—figure supplement 1—source data 2. — (Figure 3—figure supplement 1). [file elife-53174-fig3-figsupp1-data2.xlsx]

## Sheet: Sheet1
Fig. 3 Sup Fig. 3B	Developmental resistance assay using 10 µg/mL TM with WT, osm-3(dh441) IV and daf-2(e1370) III mutants
		Vehicle			TM (10µg/ml)
	WT	100	100	100	0	0	0
	osm-3(dh441)IV	61	100	87	93	79	84
	daf-2(e1370)III	100	100	100	7	0	0
