# Supplementary material for: NHR-8 and P-glycoproteins uncouple xenobiotic resistance from longevity in chemosensory C. elegans mutants
Source: eLife. 2021 Aug 27;10:e53174. doi: 10.7554/eLife.53174 (PMC8460253; doi:10.7554/eLife.53174)
Supplement: Figure 3—source data 1. — (Figure 3B). [file elife-53174-fig3-data1.xlsx]

## Sheet: Sheet1
Fig. 3B	Developmental resistance assay using 10 µg/mL TM with WT, osm-3(dh441) IV, daf-16(mu86) I, and osm-3(dh441) IV; daf-16(mu86) I mutants
		Control			TM (10 μg/mL)
	WT	100	100	86	0	0	0
	osm-3(dh441)IV	90	100	100	100	92	100
	daf-16(mu86)I	100	100	90	0	0	0
	osm-3(dh441)IV; daf-16(mu86)I	100	100	100	90	90	93
