# Supplementary material for: NHR-8 and P-glycoproteins uncouple xenobiotic resistance from longevity in chemosensory C. elegans mutants
Source: eLife. 2021 Aug 27;10:e53174. doi: 10.7554/eLife.53174 (PMC8460253; doi:10.7554/eLife.53174)
Supplement: Figure 3—source data 2. — (Figure 3D). [file elife-53174-fig3-data2.xlsx]

## Sheet: Sheet1
Fig. 3D	Developmental resistance assay using 10 µg/mL TM with WT, osm-3(dh441)IV, pmk-1(km25)IV, and osm-3(dh441)IV; pmk-1(km25)IV mutants
		Control			TM (10 μg/mL)
	WT	100	97	97	0	0	0
	osm-3(dh441)IV;	100	96	97	93	100	100
	pmk-1(km25)IV	100	90	96	0	0	0
	osm-3(dh441)IV; pmk-1(km-25)IV	95	100	86	92	100	92
