# Supplementary material for: NHR-8 and P-glycoproteins uncouple xenobiotic resistance from longevity in chemosensory C. elegans mutants
Source: eLife. 2021 Aug 27;10:e53174. doi: 10.7554/eLife.53174 (PMC8460253; doi:10.7554/eLife.53174)
Supplement: Figure 4—figure supplement 1—source data 2. — (Figure 4—figure supplement 1). [file elife-53174-fig4-figsupp1-data2.xlsx]

## Sheet: Sheet1
Fig.4 Sup Fig. 4B	Hydrogen peroxide survival assay using 1µM H2O2 on day 1 of adulthood in WT and osm-3(dh441)IV animals
	Time (Hours)	WT	osm-3(dh441)IV		0=alive
	2	0			1=dead
	2	0
	2	0
	2	0
	2	0
	2	0
	2	0
	2	0
	2	0
	4	1
	4	1
	4	1
	4	1
	4	1
	4	1
	4	1
	4	1
	4	1
	4	1
	4	1
	4	1
	4	1
	4	1
	4	1
	4	1
	4	1
	4	1
	4	1
	4	1
	4	1
	4	1
	4	1
	4	1
	4	1
	4	1
	4	1
	4	1
	4	1
	4	1
	4	1
	4	1
	4	1
	4	1
	4	1
	4	1
	4	1
	4	1
	4	1
	4	0
	4	0
	4	0
	4	0
	6	1
	6	1
	6	1
	6	1
	6	1
	6	1
	6	1
	6	1
	6	1
	6	1
	6	1
	6	1
	6	1
	6	1
	8	1
	8	1
	2		0
	2		0
	2		0
	2		0
	2		0
	2		0
	2		0
	2		0
	2		0
	2		0
	2		0
	2		0
	4		1
	4		1
	4		1
	4		1
	4		1
	4		1
	4		1
	4		1
	4		1
	4		1
	4		1
	4		1
	4		1
	4		1
	4		1
	4		1
	4		1
	4		1
	4		1
	4		1
	4		1
	4		1
	4		1
	4		1
	4		1
	4		1
	4		1
	4		1
	4		1
	4		1
	4		1
	4		1
	4		1
	4		1
	4		1
	4		1
	4		1
	4		1
	4		1
	4		1
	4		1
	4		1
	4		0
	6		1
	6		1
	6		1
	6		1
	6		1
	6		1
	6		1
	6		1
	6		1
	6		1
	6		1
	6		1
	6		1
	6		1
	6		1
	8		1
	8		1
	8		0
	8		0
