# Supplementary material for: NHR-8 and P-glycoproteins uncouple xenobiotic resistance from longevity in chemosensory C. elegans mutants
Source: eLife. 2021 Aug 27;10:e53174. doi: 10.7554/eLife.53174 (PMC8460253; doi:10.7554/eLife.53174)
Supplement: Figure 4—figure supplement 1—source data 3. — (Figure 4—figure supplement 1). [file elife-53174-fig4-figsupp1-data3.xlsx]

## Sheet: Sheet1
Fig.4 Sup Fig. 4C	WT development on 0 to 1µM Verapamil
	Verapamil	WT
	0	100	100	100
	0.0001	83	93	91
	0.001	79	79	100
	0.01	100	100	91
	0.1	100	100	82
	1	94	90	100
