# Supplementary material for: NHR-8 and P-glycoproteins uncouple xenobiotic resistance from longevity in chemosensory C. elegans mutants
Source: eLife. 2021 Aug 27;10:e53174. doi: 10.7554/eLife.53174 (PMC8460253; doi:10.7554/eLife.53174)
Supplement: Figure 4—source data 1. [file elife-53174-fig4-data1.xlsx]

## Sheet: Sheet1
Fig. 4A	Quantitative PCR measuring relative PGP mRNA expression in WT, osm-3(dh441)IV, nhr-8(hd117)IV and osm-3(dh441)IV; nhr-8(hd117)IV animals
		Wild type				osm-3(dh441)IV				nhr-8(hd117)IV				osm-3(dh441)IV; nhr-8(hd117)IV
	pgp-1	1	1	1	1	1.745	1.753	1.691	2.843	0.704	0.56	0.978	0.977	1.167	1.461	1.241	0.523
	pgp-2	1	1	1	1	2.272	4.312	1.23	2.045	1.041	0.68	0.939	0.666	1.088	1.042	0.777	0.501
	pgp-3	1	1	1	1	8.828	9.41	1.546	2.47	1.29	0.57	1.077	1.165	2.098	5.597	1.722	1.202
	pgp-4	1	1	1	1	0.462	1.203	1.05	2.308	0.574	0.399	0.639	0.537	0.61	0.252	0.553	0.746
	pgp-5	1	1	1	1	4.572	21.437	1.192	2.153	1.614	0.876	1.632	1.346	1.926	8.942	1.643	1.19
	pgp-6	1	1	1	1	2.98	5.548	0.901	2.499	1.613	0.852	1.685	1.163	1.875	3.343	1.398	1.077
	pgp-7	1	1	1	1	1.196	4.23	0.659	2.564	1.873	0.578	1.145	0.461	2.79	1.395	1.257	1.215
	pgp-8	1	1	1	1	11.377	1.742	2.61		1.602	0.398	1.782	1.542	1.642	1.174	1.324
	pgp-9	1	1	1	1	3.589	4.133	0.945	3.373	0.393	0.214	0.27	0.237	0.355	1.008	0.333	0.456
	pgp-10	1	1	1	1	1.497	1.358	1.503	3.057	1.519	0.925	1.565	0.537	1.742	0.339	1.476	1.211
	pgp-11	1	1	1	1	10.957	20.267	0.788	3.077	0.848	0.297	0.629	0.498	0.886	9.185	0.81	0.794
	pgp-12	1	1	1	1	1.987	1.005	1.343	3.567	0.506	0.371	0.528	0.445	0.542	0.586	0.531	0.268
	pgp-13	1	1	1	1	2.295	17.488	1.349	1.594	0.586	0.372	0.412	0.487	0.686	3.417	0.455	0.225
	pgp-14	1	1	1	1	1.977	1.844	1.292	2.582	3.433	2.306	2.848	2.804	2.918	2.634	1.931	1.901
	n=>3
	2way ANOVA, multiple comparisons
pgp-3	p value= 0,0401 WT vs osm-3(dh441)
	p value= 0,0417 osm-3(dh441) vs nrh-8(hd117)
pgp-5	p value= 0,0015 WT vs osm-3(dh441)
	p value= 0,0032 osm-3(dh441) vs nrh-8(hd117)
pgp-11	p value<0,0001 WT vs osm-3(dh441)
	p value<0,0001 osm-3(dh441) vs nrh-8(hd117)
	p value=0,0041 osm-3(dh441) vs osm-3(dh441); nrh-8(hd117)
pgp-13	p value=0,033 WT vs osm-3(dh441)
	p value=0,0135 osm-3(dh441) vs nrh-8(hd117)
	p value=0,0452 osm-3(dh441) vs osm-3(dh441); nrh-8(hd117)
