# Supplementary material for: NHR-8 and P-glycoproteins uncouple xenobiotic resistance from longevity in chemosensory C. elegans mutants
Source: eLife. 2021 Aug 27;10:e53174. doi: 10.7554/eLife.53174 (PMC8460253; doi:10.7554/eLife.53174)
Supplement: Figure 4—source data 2. — (Figure 4B). [file elife-53174-fig4-data2.xlsx]

## Sheet: Sheet1
Fig. 4B	Developmental TM resistance assay using 10 µg/mL TM and the indicated PGPs RNAi treatment.
		Vehicle				TM (10µg/mL)
	Control	100	90	100	100	81.8182	92.8571	91.6667	100
	pgp-5	100	100	100	100	84.2105	57.1429	58.8235	75
	pgp-8	100	90	100	100	80	100	100	93.3333
	pgp-11	100	100	90.9091	100	60	25	33.3333	66.6667
	pgp-12	90	100	100	100	75	36	66.6667	88.2353
	pgp-13	100	100	100	90	86.6667	100	93.3333	100
	2way ANOVA; multiple comparison
	n=3
	p value=0,013 vehicle pgp-5 vs TM pgp-5
	p value<0,0001 vehicle pgp-11 vs TM pgp-11
	p value=0,014 vehicle pgp-12 vs TM pgp-12
