# Supplementary material for: NHR-8 and P-glycoproteins uncouple xenobiotic resistance from longevity in chemosensory C. elegans mutants
Source: eLife. 2021 Aug 27;10:e53174. doi: 10.7554/eLife.53174 (PMC8460253; doi:10.7554/eLife.53174)
Supplement: Figure 4—source data 3. — (Figure 4C). [file elife-53174-fig4-data3.xlsx]

## Sheet: Sheet1
Fig. 4C	Developmental TM resistance assay using the PGP inhibitor verapamil (VPL) using 10 µg/mL TM supplemented with vehicle or 1 nM VPL
		Control			TM (10µg/mL)
	Vehicle	80	90	91	67	71	73
	Verapamil 1 nM	94	100	100	33	20	32
	2way ANOVA; multiple comparison
	n=3
	p value<0,0001 vehicle Verapamil vs TM Verapamil
