# Supplementary material for: NHR-8 and P-glycoproteins uncouple xenobiotic resistance from longevity in chemosensory C. elegans mutants
Source: eLife. 2021 Aug 27;10:e53174. doi: 10.7554/eLife.53174 (PMC8460253; doi:10.7554/eLife.53174)
Supplement: Figure 4—source data 4. [file elife-53174-fig4-data4.xlsx]

## Sheet: Sheet1
Fig. 4D	Developmental TM resistance assay on 10 µg/mL TM and control with WT, osm-3(dh441)IV, nhr-8(hd117)IV and osm-3(dh441)IV; nhr-8(hd117)IV animals
		Vehicle			TM (10µg/mL)
	Wild type	90	92	100	0	0	0
	osm-3(dh441)IV	100	100	100	93	82	92
	nhr-8(hd117)IV	70	78	91	0	0	0
	osm-3(dh441)IV; nhr-8(hd117)IV	100	100	100	0	20	0
	2way ANOVA; multiple comparison
	n=3
	p value<0,0001 vehicle nrh-8(hd115) vs TM nrh-8(hd115)
	p value<0,0001 vehicle osm-3(dh441); nrh-8(hd115) vs TM osm-3(dh441); nrh-8(hd115)
