# Supplementary material for: NHR-8 and P-glycoproteins uncouple xenobiotic resistance from longevity in chemosensory C. elegans mutants
Source: eLife. 2021 Aug 27;10:e53174. doi: 10.7554/eLife.53174 (PMC8460253; doi:10.7554/eLife.53174)
Supplement: Figure 4—source data 5. [file elife-53174-fig4-data5.xlsx]

## Sheet: Sheet1
Fig. 4E	Developmental paraquat resistance assay of WT, osm-3(dh441)IV, nhr-8(hd117)IV and osm-3(dh441)IV; nhr-8(hd117)IV animals using 6 ng/mL Ivermectin and vehicle control
		Vehicle				Ivermectine
	WT	100	91.6667	100	100	0	0	0	0
	osm-3(dh441)IV	100	90.4762	100	100	100	86.6667	100	100
	nrh-8(hd117)IV	100	100	100	90.9091	0	0	0	0
	osm-3(dh441)IV; nrh-8(hd117)IV	100	100	86.6667	100	35	31.8182	42.8571	40
	2way ANOVA; multiple comparison
	n=3
	p value<0,0001 vehicle nrh-8(hd115) vs Ivermectine nrh-8(hd115)
	p value<0,0001 vehicle osm-3(dh441); nrh-8(hd115) vs Ivermectine osm-3(dh441); nrh-8(hd115)
