# Supplementary material for: NHR-8 and P-glycoproteins uncouple xenobiotic resistance from longevity in chemosensory C. elegans mutants
Source: eLife. 2021 Aug 27;10:e53174. doi: 10.7554/eLife.53174 (PMC8460253; doi:10.7554/eLife.53174)
Supplement: Figure 4—source data 6. [file elife-53174-fig4-data6.xlsx]

## Sheet: Sheet1
Fig. 4F	Developmental paraquat resistance assay of WT, osm-3(dh441)IV, nhr-8(hd117)IV and osm-3(dh441)IV; nhr-8(hd117)IV animals using 0.2 mM paraquat and vehicle control
		Vehicle				Paraquat
	WT	100	85.7143	100	100	0	46.1538	20.8333	40
	osm-3(dh441)IV	100	95	100	91.6667	87.5	68.1818	78.9474	100
	nrh-8(hd117)IV	100	93.0233	100	100	5	0	0	5
	osm-3(dh441)IV; nrh-8(hd117)IV	93.3333	100	91.6667	100	31.5789	4.54545	7.14286	45
	2way ANOVA; multiple comparison
	n=3
	p value<0,0001 vehicle WT vs Paraquat WT
	p value<0,0001 vehicle nrh-8(hd115) vs Paraquat nrh-8(hd115)
	p value<0,0001 vehicle osm-3(dh441); nrh-8(hd115) vs Paraquat osm-3(dh441); nrh-8(hd115)
