# Supplementary material for: NHR-8 and P-glycoproteins uncouple xenobiotic resistance from longevity in chemosensory C. elegans mutants
Source: eLife. 2021 Aug 27;10:e53174. doi: 10.7554/eLife.53174 (PMC8460253; doi:10.7554/eLife.53174)
Supplement: Figure 5—source data 1. — (Figure 5A). [file elife-53174-fig5-data1.xlsx]

## Sheet: Sheet1
Fig. 5A	Developmental dose response TM resistance assay using the indicated TM concentrations with WT animals and osm-3(dh441)IV mutants raised on 0 or 5 ug/mL cholesterol.
	TM (μg/mL)	WT + cholesterol					WT - cholesterol					osm-3(dh441IV) + cholesterol					osm-3(dh441IV) - cholesterol
	0	96	91	100	100	100	83	100	100	83	94	93	100	75	100	85	100	100	100	90	100
	2	69	61	70	80	81	0	0	13	0	7	100	93	100	88	80	94	100	92	93	55
	4	53	36	47	52	60	0	0	0	0	0	100	100	92	100	100	67	52	76	76	95
	6	0	0	39	31	32	0	0	0	0	0	95	100	86	85	92	26	31	41	55	38
	8	0	0	10	0	0	0	0	0	0	0	100	100	89	85	92	0	0	0	7	25
	10	0	0	9	0	0	0	0	0	0	0	94	94	86	90	100	0	0	0	8	15
