# Supplementary material for: NHR-8 and P-glycoproteins uncouple xenobiotic resistance from longevity in chemosensory C. elegans mutants
Source: eLife. 2021 Aug 27;10:e53174. doi: 10.7554/eLife.53174 (PMC8460253; doi:10.7554/eLife.53174)
Supplement: Figure 5—source data 2. — (Figure 5B). [file elife-53174-fig5-data2.xlsx]

## Sheet: Sheet1
Fig. 5B	Biosorter analysis of WT animals with the hsp-4::GFP reporter raised on 0 or 50 µg/mL cholesterol after 6 hours of vehicle or 5 µg/mL TM treatment
		Vehicle			TM (5µg/ml)
	0 chol	1	1	1	19.0416	17.6766	20.2519
	50 chol	1.06597	1.03982	1.15467	5.42436	4.17381	6.58583
		2way ANOVA
		n=3
		p value<0,0001 0 chol vehicle vs 0 chol TM
		p value=0,002 50 chol vehicle vs 50 chol TM
		p value<0,0001 0 chol TM vs 50 chol TM
