# Supplementary material for: NHR-8 and P-glycoproteins uncouple xenobiotic resistance from longevity in chemosensory C. elegans mutants
Source: eLife. 2021 Aug 27;10:e53174. doi: 10.7554/eLife.53174 (PMC8460253; doi:10.7554/eLife.53174)
Supplement: Figure 5—source data 3. — (Figure 5C). [file elife-53174-fig5-data3.xlsx]

## Sheet: Sheet1
Fig. 5C	Cholesterol dose response developmental assay with WT, osm-3(dh441)IV, nhr-8(hd117)IV and osm-3(dh441)IV; nhr-8(hd117)IV animals on vehicle or 5 µg/mL TM
		WT			WT- 5 µg/ml TM			osm-3(dh441IV- Control			osm-3(dh441)IV- 5 µg/ml TM			nhr-8(hd117)- Control			nhr-8(hd117)- 5 µg/ml TM			osm-3;nhr-8- Control			osm-3;nhr-8- 5 µg/ml TM
	0	100	95	100	0	0	0	100	100	96	52	43	42	18	33	0	0	0	0	42	24	40	0	0	0
	5	100	98	100	29	41	34	96	95	100	91	100	95	67	75	79	0	0	0	58	71	67	0	0	0
	25	88	100	100	90	86	84	100	100	100	95	100	100	59	79	58	0	0	0	46	57	50	12	0	26
	50	100	100	95	84	88	97	94	100	96	100	100	100	56	76	64	0	3	0	80	50	56	12	15	12
