# Supplementary material for: NHR-8 and P-glycoproteins uncouple xenobiotic resistance from longevity in chemosensory C. elegans mutants
Source: eLife journal article supplement (doi:10.7554/elife.53174), 2021-08-27
Supplement: supp [file elife-53174-supp-v1.zip]

Archive with 8 entries (8 files):
- elife_poa_e53174_Source_data_1.zip
- elife_poa_e53174_Transparent_Reporting_File.pdf
- elife_poa_e53174_Figure_1_figure_supplement_1.docx
- elife_poa_e53174_Figure_2_figure_supplement_1.docx
- elife_poa_e53174_Figure_3_figure_supplement_1.docx
- elife_poa_e53174_Figure_4_figure_supplement_1.docx
- elife_poa_e53174_Supplementary_file_1.docx
- elife_poa_e53174_Supplementary_file_2.docx
