# Supplementary material for: NHR-8 and P-glycoproteins uncouple xenobiotic resistance from longevity in chemosensory C. elegans mutants
Source: eLife journal article supplement (doi:10.7554/elife.53174), 2021-08-27
Supplement: supp [file elife-53174-supp-v1.zip › elife_poa_e53174_Figure_1_figure_supplement_1.docx]

**Figure 1-figure supplement: Tunicamycin resistance occurs in dye filling defective long-lived chemosensory *C. elegans* mutants**

**Figure 1-figure supplement 1, A-J.** Developmental TM resistance assay with WT, *che-2(e1033)X, che-11(e1810)V*, *daf-10(e1387)V*, *dyf-1(mn335)I, osm-1(p808)X, osm-5(p813)X,* *osm-6(p811)V, odr-1(n1936)X*, *odr-3(n2150)V* and *tax-4(p678)III* animals. Data are mean ±SD (n=1 for J; n=2 for B, C, E, G, H and I; n=3 for A, D and F independent experiments with >15 scored animals each).
