# Supplementary material for: NHR-8 and P-glycoproteins uncouple xenobiotic resistance from longevity in chemosensory C. elegans mutants
Source: eLife journal article supplement (doi:10.7554/elife.53174), 2021-08-27
Supplement: supp [file elife-53174-supp-v1.zip › elife_poa_e53174_Figure_2_figure_supplement_1.docx]

**Figure 2-figure supplement: Reduced tunicamycin-induced ER stress signaling in *osm‑3* mutants despite functional ER-UPR pathway**


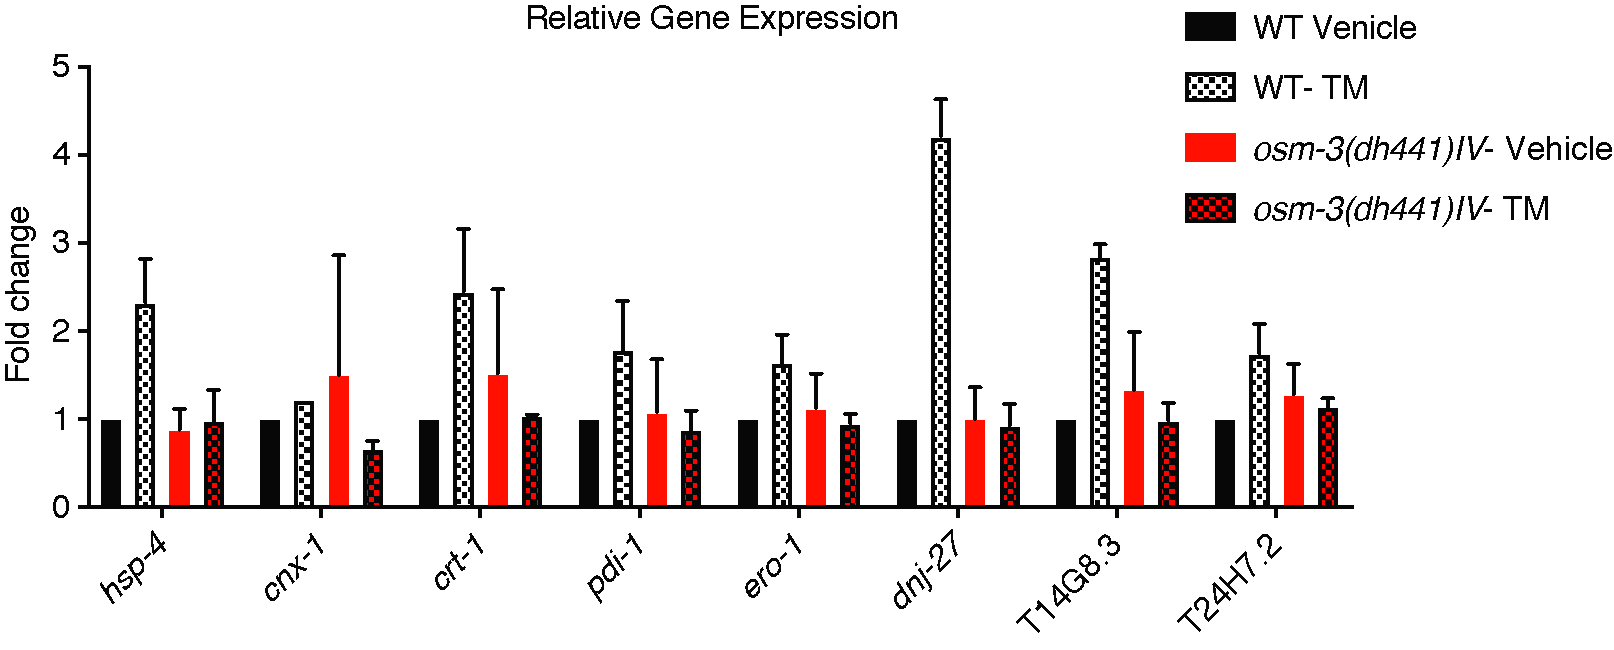


**Figure 2-figure supplement,** Quantitative PCR measuring relative mRNA expression of indicated genes in WT animals and *osm-3(dh441)IV* mutants after 6 hours of vehicle or TM treatment. Fold change represents mRNA expression levels of the targeted genes normalized to WT treated with vehicle. Data are mean +SEM, n=2.
