# Supplementary material for: NHR-8 and P-glycoproteins uncouple xenobiotic resistance from longevity in chemosensory C. elegans mutants
Source: eLife journal article supplement (doi:10.7554/elife.53174), 2021-08-27
Supplement: supp [file elife-53174-supp-v1.zip › elife_poa_e53174_Figure_3_figure_supplement_1.docx]

**Figure 3-figure supplement: Tunicamycin resistance in *osm-3* mutants is not *daf-16* or *pmk-1* dependent**

**Figure 3-figure supplement, A.** Biosorter analysis of *osm-3(dh441)IV* vs. WT animals in the *hsp-4*::GFP background raised on control or *daf-16* RNAi. Data are mean +SEM, n=4, *** p<0.0001 by two-way ANOVA. **B.** Developmental resistance assay using 10 µg/mL TM with WT, *osm-3(dh441)IV* and *daf-2(e1370)III* animals. No viable animals were observed in TM treated WT. Data are mean +SEM, n=3.
