# Supplementary material for: NHR-8 and P-glycoproteins uncouple xenobiotic resistance from longevity in chemosensory C. elegans mutants
Source: eLife journal article supplement (doi:10.7554/elife.53174), 2021-08-27
Supplement: supp [file elife-53174-supp-v1.zip › elife_poa_e53174_Figure_4_figure_supplement_1.docx]

**Figure 4-figure supplement: *nhr-8* signaling regulates xenobiotic detoxification response through PGPs**

**Figure 4-figure supplement, A.** Heat shock assay at 35°C in WT and *osm‑3(dh441)IV* animals on day 1 of adulthood. See Supplementary file 1 for statistical analysis. **B.** Hydrogen peroxide survival assay using 1 µM H2O2 on day 1 of adulthood in WT and *osm-3(dh441)IV* animals. See Supplementary file 1 for statistical analysis. **C.** WT development on 0 to 1 µM Verapamil. No significant difference in development. Data are mean ±SD (n=3 independent experiments with >9 scored animals each).
