# Supplementary material for: NHR-8 and P-glycoproteins uncouple xenobiotic resistance from longevity in chemosensory C. elegans mutants
Source: eLife journal article supplement (doi:10.7554/elife.53174), 2021-08-27
Supplement: supp [file Figure1 source data.xlsx]

## Sheet: Fig 1C
Fig. 1C	Developmental tunicamycin (TM) resistance assay using the indicated concentrations with WT and osm-3(dh441)IV animals.
	TM (µg/ml)	WT			osm-3(dh441) IV
	0	100	100	100	61	100	87
	2	43	71	47	100	100	96
	4	25	27	39	100	93	77
	6	0	0	0	69	87	88
	8	0	0	0	82	94	95
	10	0	0	0	93	79	84

## Sheet: Fig.1 Sup Fig. 1A
Fig.1 Sup Fig. 1A	Developmental TM resistance assay with WT and che-2(e1033)X animals.
	TM (µg/ml)	WT			che-2(e1033)X
	0	80	100	100	94	100	71
	2	90	86	82	88	75	84
	4	40	80	44	80	73	71
	6	46	37	20	76	81	76
	8	8	4	0	61	78	65
	10	0	0	0	48	48	44

## Sheet: Fig.1 Sup Fig. 1B
Fig.1 Sup Fig. 1B	Developmental TM resistance assay with WT and che-11(e1810)V animals.
	TM (µg/ml)	WT		che-11(e1810)V
	0	100	100	100	82
	2	63	100	100	100
	4	21	31	100	93
	6	9	0	90	67
	8	0	0	75	31
	10	0	0	64	60

## Sheet: Fig.1 Sup Fig. 1C
Fig.1 Sup Fig. 1C	Developmental TM resistance assay with WT and daf-10(e1387)V animals.
	TM (µg/ml)	WT		daf-10(e1387)V
	0	100	100	100	100
	2	63	100	100	100
	4	21	31	94	100
	6	9	0	82	93
	8	0	0	88	75
	10	0	0	36	70

## Sheet: Fig.1 Sup Fig. 1D
Fig.1 Sup Fig. 1D	Developmental TM resistance assay with WT and dyf-1(mn335)I animals.
	TM (µg/ml)	WT			dyf-1(mn335)I
	0	80	100	100	100	100	96
	2	90	86	82	100	100	92
	4	40	80	44	100	97	100
	6	46	37	20	100	88	100
	8	8	4	0	82	86	100
	10	0	0	0	84	72	60

## Sheet: Fig.1 Sup Fig. 1E
Fig.1 Sup Fig. 1E	Developmental TM resistance assay with WT and osm-1(p808)X animals.
	TM (µg/ml)	WT		osm-1(p808)X
	0	100	100	92	100
	2	63	100	100	50
	4	21	31	100	70
	6	9	0	70	70
	8	0	0	71	75
	10	0	0	88	83

## Sheet: Fig.1 Sup Fig. 1F
Fig.1 Sup Fig. 1F	Developmental TM resistance assay with WT and osm-5(p813)X animals.
	TM (µg/ml)	WT			osm-5(p813)X
	0	80	100	100	100	89	94
	2	90	86	82	100	89	100
	4	40	80	44	92	83	100
	6	46	37	20	87	96	97
	8	8	4	0	100	86	100
	10	0	0	0	65	93	91

## Sheet: Fig.1 Sup Fig. 1G
Fig.1 Sup Fig. 1G	Developmental TM resistance assay with WT and osm-6(p811)V animals.
	TM (µg/ml)	WT		osm-6(p811)V
	0	100	100	93	100
	2	63	100	100	83
	4	21	31	89	100
	6	9	0	89	100
	8	0	0	78	100
	10	0	0	91	75

## Sheet: Fig.1 Sup Fig. 1H
Fig.1 Sup Fig. 1H	Developmental TM resistance assay with WT and odr-1(n1936)X animals.
	TM (µg/ml)	WT		odr-1(n1936)X
	0	100	100	93	100
	2	89	100	63	56
	4	35	30	14	43
	6	10	9	21	19
	8	0	0	0	0
	10	0	0	0	0

## Sheet: Fig.1 Sup Fig. 1I
Fig.1 Sup Fig. 1I	Developmental TM resistance assay with WT and odr-3(n2150)V animals.
	TM (µg/ml)	WT		odr-3(n2150)X
	0	100	100	90	94
	2	89	100	100	92
	4	35	30	70	60
	6	10	9	12	25
	8	0	0	0	0
	10	0	0	0	0

[truncated: 1 more sheets: Fig.1 Sup Fig. 1J]
