# Supplementary material for: NHR-8 and P-glycoproteins uncouple xenobiotic resistance from longevity in chemosensory C. elegans mutants
Source: eLife journal article supplement (doi:10.7554/elife.53174), 2021-08-27
Supplement: supp [file Figure2 source data.xlsx]

## Sheet: Fig. 2C
Fig. 2C	Biosorter analysis of osm-3(dh441)IV vs. WT animals in the hsp-4::GFP background after 6 hours of control or TM treatment
		Wild type					osm-3(dh441)IV
	Vehicle	1	1	1	1	1	0.573063	0.65438	0.794731	0.558998	0.524918
	Tunicamycin (10 µg/ml)	2.37791	4.40807	3.32709	3.87929	2.99957	0.75467	1.24498	0.952055	0.627873	0.649929
		2way ANOVA; multiple comparaison
		n=5
		p value<0,0001 WT vehicle vs WT TM

## Sheet: Fig. 2E
Fig. 2E	Biosorter analysis of osm-3(dh441)IV vs. WT animals in the hsp-4::GFP background raised on control or sel-1 RNAi.
		Wild type			osm-3(dh441)IV
	Control	1	1	1	0.660228	0.539938	0.54071
	sel-1	4.4745	3.39341	3.94116	2.79029	2.50683	1.43293
		2way ANOVA; multiple comparaison
		n=3
		p value<0,0001 Control;WT vs sel-1;WT
		p value=0,0039 Control;osm-3(dh441) vs sel-1;osm-3(dh441)

## Sheet: Fig. 2F
Fig. 2F	Quantitative PCR measuring relative hsp-4 and spliced and unspliced xbp-1 mRNA levels in WT and osm-3(dh441)IV animals after 2 hours of 10 mM DTT treatment
		WT hsp-4			osm-3(dh441)IV hsp-4			WT xbp-1 unspliced			osm-3(dh441)IV xbp-1 unspliced			WT xbp-1 spliced			osm-3(dh441)IV xbp-1 spliced
	Vehicle	1	1	1	0.827	0.429	0.307	1	1	1	1.665	0.578	0.569	1	1	1	1.149	0.221	0.096
	10 mM DTT	10.796	6.735	2.906	3.86	4.663	5.561	0.309	0.202	0.172	4.269	0.298	0.444	11.421	6.937	9.884	11.612	6.306	13.562
		2way ANOVA; multiple comparaison
		n=3
		p value=0,0018 WT;hsp-4 vehicle vs WT;hsp-4 DTT
		p value=0,0429 osm-3(dh441);hsp-4 vehicle vs osm-3(dh441);hsp-4 DTT
		p value<0,0001 WT;xbp-1 vehicle vs WT;xbp-1 DTT
		p value<0,0001 osm-3(dh441);xbp-1 vehicle vs osm-3(dh441);xbp-1 DTT

## Sheet: Fig.2 Sup Fig. 2A
Fig.2 Sup Fig. 2A	Quantitative PCR measuring relative mRNA expression of indicated genes in WT animals and osm-3(dh441)IV mutants after 6 hours of vehicle or TM treatment
		WT		WT TM		osm-3(dh441)IV		osm-3(dh441)IV TM
	hsp-4	1	1	1.974	2.669	0.715	1.051	0.729	1.226
	cnx-1	1	1		1.218	0.544	2.462	0.604	0.728
	crt-1	1	1	1.954	2.949	0.842	2.194	1.048	1.024
	pdi-1	1	1	1.396	2.178	0.647	1.504	0.72	1.031
	ero-1	1	1	1.415	1.863	0.847	1.4	0.874	1.028
	dnj-27	1	1	4.509	3.914	0.746	1.256	0.752	1.099
	T14G8.3	1	1	2.736	2.942	0.865	1.797	1.123	0.841
	T24H7.2	1	1	1.498	1.98	1.041	1.525	1.074	1.206
