# Supplementary material for: NHR-8 and P-glycoproteins uncouple xenobiotic resistance from longevity in chemosensory C. elegans mutants
Source: eLife journal article supplement (doi:10.7554/elife.53174), 2021-08-27
Supplement: supp [file Figure3 source data.xlsx]

## Sheet: Fig. 3B
Fig. 3B	Developmental resistance assay using 10 µg/mL TM with WT, osm-3(dh441) IV, daf-16(mu86) I, and osm-3(dh441) IV; daf-16(mu86) I mutants
		Control			TM (10 μg/mL)
	WT	100	100	86	0	0	0
	osm-3(dh441)IV	90	100	100	100	92	100
	daf-16(mu86)I	100	100	90	0	0	0
	osm-3(dh441)IV; daf-16(mu86)I	100	100	100	90	90	93

## Sheet: Fig. 3D
Fig. 3D	Developmental resistance assay using 10 µg/mL TM with WT, osm-3(dh441)IV, pmk-1(km25)IV, and osm-3(dh441)IV; pmk-1(km25)IV mutants
		Control			TM (10 μg/mL)
	WT	100	97	97	0	0	0
	osm-3(dh441)IV;	100	96	97	93	100	100
	pmk-1(km25)IV	100	90	96	0	0	0
	osm-3(dh441)IV; pmk-1(km-25)IV	95	100	86	92	100	92

## Sheet: Fig.3 Sup Fig. 3A
Fig. 3 Sup Fig. 3A	Biosorter analysis of osm-3(dh441)IV vs. WT animals in the hsp-4::GFP background raised on control or daf-16 RNAi
		WT Luci			osm-3(dh441) Luci			WT- daf-16i			osm-3(dh441)- daf-16i
	Control	1	1	1	0.794731	0.558998	0.524918	0.863692	0.883868	0.7646	0.7489	0.590215	0.478156
	TM	3.32709	3.87929	2.99957	0.952055	0.627873	0.649929	3.01122	3.53743	3.04679	0.729394	0.596494	0.668255
		2way ANOVA; multiple comparaison
		n=3
		p value<0,0001 WT;Control vehicle vs WT;Control TM
		p value<0,0001 WT;daf-16i vehicle vs WT;daf-16i TM

## Sheet: Fig.3 Sup Fig. 3B
Fig. 3 Sup Fig. 3B	Developmental resistance assay using 10 µg/mL TM with WT, osm-3(dh441) IV and daf-2(e1370) III mutants
		Vehicle			TM (10 μg/mL)
	WT	100	100	100	0	0	0
	osm-3(dh441)IV	61	100	87	93	79	84
	daf-2(e1370)III	100	100	100	7	0	0
