# Supplementary material for: NHR-8 and P-glycoproteins uncouple xenobiotic resistance from longevity in chemosensory C. elegans mutants
Source: eLife journal article supplement (doi:10.7554/elife.53174), 2021-08-27
Supplement: supp [file Figure4 source data.xlsx]

## Sheet: Fig. 4A
Fig. 4A	Quantitative PCR measuring relative PGP mRNA expression in WT, osm-3(dh441)IV, nhr-8(hd117)IV and osm-3(dh441)IV; nhr-8(hd117)IV animals
		Wild type				osm-3(dh441)IV				nhr-8(hd117)IV				osm-3(dh441)IV; nhr-8(hd117)IV
	pgp-1	1	1	1	1	1.745	1.753	1.691	2.843	0.704	0.56	0.978	0.977	1.167	1.461	1.241	0.523
	pgp-2	1	1	1	1	2.272	4.312	1.23	2.045	1.041	0.68	0.939	0.666	1.088	1.042	0.777	0.501
	pgp-3	1	1	1	1	8.828	9.41	1.546	2.47	1.29	0.57	1.077	1.165	2.098	5.597	1.722	1.202
	pgp-4	1	1	1	1	0.462	1.203	1.05	2.308	0.574	0.399	0.639	0.537	0.61	0.252	0.553	0.746
	pgp-5	1	1	1	1	4.572	21.437	1.192	2.153	1.614	0.876	1.632	1.346	1.926	8.942	1.643	1.19
	pgp-6	1	1	1	1	2.98	5.548	0.901	2.499	1.613	0.852	1.685	1.163	1.875	3.343	1.398	1.077
	pgp-7	1	1	1	1	1.196	4.23	0.659	2.564	1.873	0.578	1.145	0.461	2.79	1.395	1.257	1.215
	pgp-8	1	1	1	1	11.377	1.742	2.61		1.602	0.398	1.782	1.542	1.642	1.174	1.324
	pgp-9	1	1	1	1	3.589	4.133	0.945	3.373	0.393	0.214	0.27	0.237	0.355	1.008	0.333	0.456
	pgp-10	1	1	1	1	1.497	1.358	1.503	3.057	1.519	0.925	1.565	0.537	1.742	0.339	1.476	1.211
	pgp-11	1	1	1	1	10.957	20.267	0.788	3.077	0.848	0.297	0.629	0.498	0.886	9.185	0.81	0.794
	pgp-12	1	1	1	1	1.987	1.005	1.343	3.567	0.506	0.371	0.528	0.445	0.542	0.586	0.531	0.268
	pgp-13	1	1	1	1	2.295	17.488	1.349	1.594	0.586	0.372	0.412	0.487	0.686	3.417	0.455	0.225
	pgp-14	1	1	1	1	1.977	1.844	1.292	2.582	3.433	2.306	2.848	2.804	2.918	2.634	1.931	1.901
	n=>3
	2way ANOVA, multiple comparisons
pgp-3	p value= 0,0401 WT vs osm-3(dh441)
	p value= 0,0417 osm-3(dh441) vs nrh-8(hd117)
pgp-5	p value= 0,0015 WT vs osm-3(dh441)
	p value= 0,0032 osm-3(dh441) vs nrh-8(hd117)
pgp-11	p value<0,0001 WT vs osm-3(dh441)
	p value<0,0001 osm-3(dh441) vs nrh-8(hd117)
	p value=0,0041 osm-3(dh441) vs osm-3(dh441); nrh-8(hd117)
pgp-13	p value=0,033 WT vs osm-3(dh441)
	p value=0,0135 osm-3(dh441) vs nrh-8(hd117)
	p value=0,0452 osm-3(dh441) vs osm-3(dh441); nrh-8(hd117)

## Sheet: Fig. 4B
Fig. 4B	Developmental TM resistance assay using 10 µg/mL TM and the indicated PGPs RNAi treatment.
		Vehicle				TM (10µg/mL)
	Control	100	90	100	100	81.8182	92.8571	91.6667	100
	pgp-5	100	100	100	100	84.2105	57.1429	58.8235	75
	pgp-8	100	90	100	100	80	100	100	93.3333
	pgp-11	100	100	90.9091	100	60	25	33.3333	66.6667
	pgp-12	90	100	100	100	75	36	66.6667	88.2353
	pgp-13	100	100	100	90	86.6667	100	93.3333	100
	2way ANOVA; multiple comparison
	n=3
	p value=0,013 vehicle pgp-5 vs TM pgp-5
	p value<0,0001 vehicle pgp-11 vs TM pgp-11
	p value=0,014 vehicle pgp-12 vs TM pgp-12

## Sheet: Fig. 4C
Fig. 4C	Developmental TM resistance assay using the PGP inhibitor verapamil (VPL) using 10 µg/mL TM supplemented with vehicle or 1 nM VPL
		Control			TM (10µg/mL)
	Vehicle	80	90	91	67	71	73
	Verapamil 1 nM	94	100	100	33	20	32
	2way ANOVA; multiple comparison
	n=3
	p value<0,0001 vehicle Verapamil vs TM Verapamil

## Sheet: Fig. 4D
Fig. 4D	Developmental TM resistance assay on 10 µg/mL TM and control with WT, osm-3(dh441)IV, nhr-8(hd117)IV and osm-3(dh441)IV; nhr-8(hd117)IV animals
		Vehicle			TM (10µg/mL)
	WT	90	92	100	0	0	0
	osm-3(dh441)IV	100	100	100	93	82	92
	nhr-8(hd117)IV	70	78	91	0	0	0
	osm-3(dh441)IV; nhr-8(hd117)IV	100	100	100	0	20	0
	2way ANOVA; multiple comparison
	n=3
	p value<0,0001 vehicle nrh-8(hd115) vs TM nrh-8(hd115)
	p value<0,0001 vehicle osm-3(dh441); nrh-8(hd115) vs TM osm-3(dh441); nrh-8(hd115)

## Sheet: Fig. 4E
Fig. 4E	Developmental paraquat resistance assay of WT, osm-3(dh441)IV, nhr-8(hd117)IV and osm-3(dh441)IV; nhr-8(hd117)IV animals using 6 ng/mL Ivermectin and vehicle control
		Vehicle				Ivermectine
	WT	100	91.6667	100	100	0	0	0	0
	osm-3(dh441)IV	100	90.4762	100	100	100	86.6667	100	100
	nrh-8(hd117)IV	100	100	100	90.9091	0	0	0	0
	osm-3(dh441)IV; nrh-8(hd117)IV	100	100	86.6667	100	35	31.8182	42.8571	40
	2way ANOVA; multiple comparison
	n=3
	p value<0,0001 vehicle nrh-8(hd115) vs Ivermectine nrh-8(hd115)
	p value<0,0001 vehicle osm-3(dh441); nrh-8(hd115) vs Ivermectine osm-3(dh441); nrh-8(hd115)

## Sheet: Fig. 4F
Fig. 4F	Developmental paraquat resistance assay of WT, osm-3(dh441)IV, nhr-8(hd117)IV and osm-3(dh441)IV; nhr-8(hd117)IV animals using 0.2 mM paraquat and vehicle control
		Vehicle				Paraquat
	WT	100	85.7143	100	100	0	46.1538	20.8333	40
	osm-3(dh441)IV	100	95	100	91.6667	87.5	68.1818	78.9474	100
	nrh-8(hd117)IV	100	93.0233	100	100	5	0	0	5
	osm-3(dh441)IV; nrh-8(hd117)IV	93.3333	100	91.6667	100	31.5789	4.54545	7.14286	45
	2way ANOVA; multiple comparison
	n=3
	p value<0,0001 vehicle WT vs Paraquat WT
	p value<0,0001 vehicle nrh-8(hd115) vs Paraquat nrh-8(hd115)
	p value<0,0001 vehicle osm-3(dh441); nrh-8(hd115) vs Paraquat osm-3(dh441); nrh-8(hd115)

## Sheet: Fig.4 Sup Fig. 4A
Fig.4 Sup Fig. 4A	Heat shock assay at 35°C in WT and osm-3(dh441)IV animals on day 1 of adulthood.
	Time (Hours)	WT	osm-3(dh441)IV		0=alive
	2	0			1=dead
	2	0
	2	0
	2	0
	2	0
	2	0
	4	1
	4	0
	4	0
	4	0
	4	0
	4	0
	6	1
	6	1
	6	1
	6	1
	6	1
	6	1
	6	1
	6	1
	6	1
	6	1
	6	1
	6	1
	6	1
	6	1
	6	1
	6	1
	6	1
	6	1
	6	1
	6	1
	6	1
	6	1
	6	1
	6	1
	6	1
	6	1
	6	1
	6	1
	6	1
	6	1
	6	1
	6	1
	6	1
	6	1
	6	1
	6	1
	6	1
	6	1
	6	1
	6	1
	6	1
	6	1
	6	1
	6	1
	6	1
	6	1
	6	1
	6	1
	6	1
	6	1
	6	1
	6	1
	6	1
	6	1
	6	1
	6	1
	6	1
	6	1
	6	1
	6	1
	6	1
	6	1
	6	1
	6	1
	6	1
	6	1
	6	0
	6	0
	6	0
	6	0
	6	0
	6	0
	6	0
	6	0
	6	0
	6	0
	6	0
	6	0
	6	0
	8	1
	8	1
	8	1
	8	1
	8	1
	8	1
	8	1
	8	1
	8	1
	8	1
	8	1
	8	1
	8	1
	8	1
	8	1
	8	1
	8	1
	8	1
	8	1
	8	1
	8	1
	8	1
	8	1
	8	1
	8	1
	8	1
	8	1
	8	1
	8	1
	8	1
	8	1
	8	1
	8	1
	8	1
	8	1
	8	1
	8	1
	8	1
	8	1
	8	1
	8	1
	8	1
	8	1
	8	1
	8	1
	8	1
	8	1
	8	1
	8	1
	8	1
	8	1
	8	1
	8	1
	8	1
	8	1
	8	1
	8	1
	8	1
	8	1
	8	1
	8	1
	8	1
	8	1
	8	1
	8	1
	10	1
	10	1
	10	1
	10	1
	2
	2
	2
	2
	2
	2
	2
	2
	2
	4
	4
	4
	4
	4
	4
	4
	4
	4
	4
	4
	4
	4
	4
	4
	4
	4
	4
	4
	4
	6
	6
	6
	6
	6
	6
	6
	6
	6
	6
	6
	6
	6
	6
	6
	6
	6
	6
	6
	6
	6
	6
	6
	6
	6
	6
	6
	6
	6
	6
	6
	6
	6
	6
	6
	6
	6
	6
	6
	6
	6
	6
	8
	8
	8
	8
	8
	8
	8
	8
	8
	8
	8
	8
	8
	8
	8
	8
	8
	8
	8
	8
	8
	8
	8
	8
	8
	8
	8
	8
	8
	8
	8
	8
	8
	8
	8
	8
	8
	8
	8
	8
	8
	8
	8
	8
	8
	8
	8
	8
	8
	8
	8
	8
	8
	8
	8
	8
	8
	8
	8
	8
	10
	10
	10
	10
	10
	10
	10
	10
	10
	10
	10
	10
	10
	10
	10
	10
	10
	10
	10
	10
	10
	10
	10
	12
	12
	12
	12
	12
	12
	2		0
	4		1
	4		1
	4		1
	4		0
	4		0
	4		0
	4		0
	4		0
	4		0
	4		0
	6		1
	6		1
	6		1
	6		1
	6		1
	6		1
	6		1
	6		1
	6		1
	6		1
	6		1
	6		1
	6		1
	6		1
	6		1
	6		1
	6		1
	6		1
	6		1
	6		1
	6		1
	6		1
	6		1
	6		1
	6		1
	6		1
	6		1
	6		1
	6		1
	6		1
	6		1
	6		1
	6		1
	6		1
	6		1
	6		1
	6		1
	6		1
	6		1
	6		1
	6		1
	6		1
	6		1
	6		1
	6		1
	6		1
	6		1
	6		1
	6		1
	6		1
	6		1
	6		1
	6		1
	6		1
	6		1
	6		1
	6		1
	6		1
	6		1
	6		1
	6		1
	6		1
	6		1
	6		1
	6		1
	6		1
	6		1
	6		1
	6		1
	6		1
	6		1
	6		1
	6		1
	6		1
	6		1
	6		1
	6		1
	6		1
	6		1
	6		1
	6		1
	6		1
	6		1
	6		1
	6		0
	6		0
	8		1
	8		1
	8		1
	8		1
	8		1
	8		1
	8		1
	8		1
	8		1
	8		1
	8		1
	8		1
	8		1
	8		1
	8		1
	8		1
	8		1
	8		1
	8		1
	8		1
	8		1
	8		1
	8		1
	8		1
	8		1
	8		1
	8		1
	8		1
	8		1
	8		1
	8		1
	8		1
	8		1
	8		1
	8		1
	8		1
	8		1
	8		1
	8		1
	8		1
	8		0
	8		0
	10		1
	10		1

## Sheet: Fig.4 Sup Fig. 4B
Fig.4 Sup Fig. 4B	Hydrogen peroxide survival assay using 1µM H2O2 on day 1 of adulthood in WT and osm-3(dh441)IV animals
	Time (Hours)	WT	osm-3(dh441)IV		0=alive
	2	0			1=dead
	2	0
	2	0
	2	0
	2	0
	2	0
	2	0
	2	0
	2	0
	4	1
	4	1
	4	1
	4	1
	4	1
	4	1
	4	1
	4	1
	4	1
	4	1
	4	1
	4	1
	4	1
	4	1
	4	1
	4	1
	4	1
	4	1
	4	1
	4	1
	4	1
	4	1
	4	1
	4	1
	4	1
	4	1
	4	1
	4	1
	4	1
	4	1
	4	1
	4	1
	4	1
	4	1
	4	1
	4	1
	4	1
	4	1
	4	1
	4	0
	4	0
	4	0
	4	0
	6	1
	6	1
	6	1
	6	1
	6	1
	6	1
	6	1
	6	1
	6	1
	6	1
	6	1
	6	1
	6	1
	6	1
	8	1
	8	1
	2		0
	2		0
	2		0
	2		0
	2		0
	2		0
	2		0
	2		0
	2		0
	2		0
	2		0
	2		0
	4		1
	4		1
	4		1
	4		1
	4		1
	4		1
	4		1
	4		1
	4		1
	4		1
	4		1
	4		1
	4		1
	4		1
	4		1
	4		1
	4		1
	4		1
	4		1
	4		1
	4		1
	4		1
	4		1
	4		1
	4		1
	4		1
	4		1
	4		1
	4		1
	4		1
	4		1
	4		1
	4		1
	4		1
	4		1
	4		1
	4		1
	4		1
	4		1
	4		1
	4		1
	4		1
	4		0
	6		1
	6		1
	6		1
	6		1
	6		1
	6		1
	6		1
	6		1
	6		1
	6		1
	6		1
	6		1
	6		1
	6		1
	6		1
	8		1
	8		1
	8		0
	8		0

## Sheet: Fig.4 Sup Fig. 4C
Fig.4 Sup Fig. 4C	WT development on 0 to 1µM Verapamil
	Verapamil	WT
	0	100	100	100
	0.0001	83	93	91
	0.001	79	79	100
	0.01	100	100	91
	0.1	100	100	82
	1	94	90	100
