# Supplementary material for: NHR-8 and P-glycoproteins uncouple xenobiotic resistance from longevity in chemosensory C. elegans mutants
Source: eLife journal article supplement (doi:10.7554/elife.53174), 2021-08-27
Supplement: supp [file Figure5 source data.xlsx]

## Sheet: Fig. 5A
Fig. 5A	Developmental dose response TM resistance assay using the indicated TM concentrations with WT animals and osm-3(dh441)IV mutants raised on 0 or 5 ug/mL cholesterol.
	TM (μg/mL)	WT + cholesterol					WT - cholesterol					osm-3(dh441IV) + cholesterol					osm-3(dh441IV) - cholesterol
	0	96	91	100	100	100	83	100	100	83	94	93	100	75	100	85	100	100	100	90	100
	2	69	61	70	80	81	0	0	13	0	7	100	93	100	88	80	94	100	92	93	55
	4	53	36	47	52	60	0	0	0	0	0	100	100	92	100	100	67	52	76	76	95
	6	0	0	39	31	32	0	0	0	0	0	95	100	86	85	92	26	31	41	55	38
	8	0	0	10	0	0	0	0	0	0	0	100	100	89	85	92	0	0	0	7	25
	10	0	0	9	0	0	0	0	0	0	0	94	94	86	90	100	0	0	0	8	15

## Sheet: Fig. 5B
Fig. 5B	Biosorter analysis of WT animals with the hsp-4::GFP reporter raised on 0 or 50 µg/mL cholesterol after 6 hours of vehicle or 5 µg/mL TM treatment
		Vehicle			TM (5µg/ml)
	0 chol	1	1	1	19.0416	17.6766	20.2519
	50 chol	1.06597	1.03982	1.15467	5.42436	4.17381	6.58583
		2way ANOVA
		n=3
		p value<0,0001 0 chol vehicle vs 0 chol TM
		p value=0,002 50 chol vehicle vs 50 chol TM
		p value<0,0001 0 chol TM vs 50 chol TM

## Sheet: Fig. 5C
Fig. 5C	Cholesterol dose response developmental assay with WT, osm-3(dh441)IV, nhr-8(hd117)IV and osm-3(dh441)IV; nhr-8(hd117)IV animals on vehicle or 5 µg/mL TM
		WT			WT- 5 µg/ml TM			osm-3(dh441IV- Control			osm-3(dh441)IV- 5 µg/ml TM			nhr-8(hd117)- Control			nhr-8(hd117)- 5 µg/ml TM			osm-3;nhr-8- Control			osm-3;nhr-8- 5 µg/ml TM
	0	100	95	100	0	0	0	100	100	96	52	43	42	18	33	0	0	0	0	42	24	40	0	0	0
	5	100	98	100	29	41	34	96	95	100	91	100	95	67	75	79	0	0	0	58	71	67	0	0	0
	25	88	100	100	90	86	84	100	100	100	95	100	100	59	79	58	0	0	0	46	57	50	12	0	26
	50	100	100	95	84	88	97	94	100	96	100	100	100	56	76	64	0	3	0	80	50	56	12	15	12
